# Supplementary material
Source: PubMed Central journal article supplement (PMC3085184)
Supplement: NIHMS288756-supplement-01.pdf [file NIHMS288756-supplement-01.pdf]

## Supplemental Information

**Figure S1. The proteomic alterations of HCT116 following starvation.** HCT116 cells were incubated with complete medium (Control) or EBSS (Starved) for 2 h. Proteins from whole cell lysates were separated on a pH 3–10 IPG strip (A) or pH 5–8 IPG strip (B) in the first dimension and on a 12% SDS-PAGE gel in the second dimension. The gels were stained with Coomassie Blue. Protein spots significantly affected by starvation are marked by arrows. The numbers are corresponding to those listed in supplemental Table 1.

**Figure S21. Verification of the change of expression levels.** (A-D). The expression levels of prohibitin (A), phosphoglycerate mutase 1 (B), VDAC (C) and HSP70 (D) in HCT116 cells cultured in complete medium (Con) or EBSS (Starvation) were assessed by RT-PCR (A-B), or by Western blot (C-D).  $\beta$ -actin was used as the control. The intensity of the PCR products (A-B) or immunoreactive bands (C-D) were determined and expressed. Primer sets for prohibitin is GGA GGC GTG GTG AAC TCT G (forward), and CTG GCA CAT TAC GTG GTC GAG (reverse), for phosphoglycerate mutase 1 is GTG CAG AAG AGA GCG ATC CG (forward) and CGG TTA GAC CCC CAT AGT GC (reverse), for b-actin is AGA AAA TCT GGC ACC ACA CC (forward), and CTC CTT AAT GTC ACG CAC GA (reverse). (E). The reduced expression level of aldehyde dehydrogenase (circled) in starved cells as indicated by the Coomassie blue staining of the 2-D electrophoresis gel was confirmed by the enzymatic activity. Cells were sonicated in 50 mM potassium phosphate buffer (pH 9.0) and the supernatant was mixed with the reaction buffer (50mM potassium phosphate buffer, pH 9.0 containing 1mM EDTA, 500  $\mu$ M NAD<sup>+</sup> and 1mM propionaldehyde) at 27°C, which led to the formation of NADH, which was determined by the absorbance at 340 nm. One unit of enzyme activity was defined as the amount of enzyme required to reduce 1  $\mu$ mol of NAD<sup>+</sup> per min at 27 °C. The extinction coefficient for NADH was 6.22 mM<sup>-1</sup> cm<sup>-1</sup>.

**A**

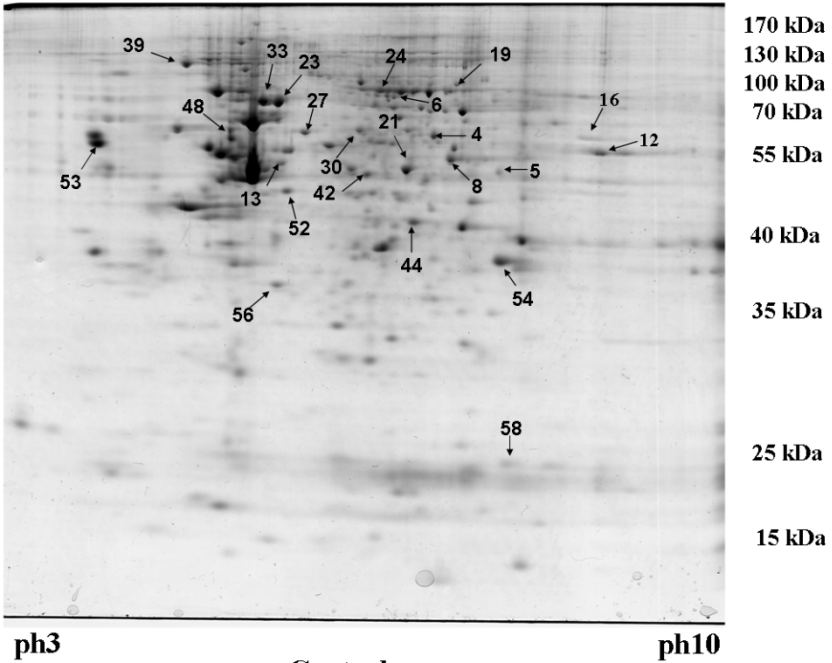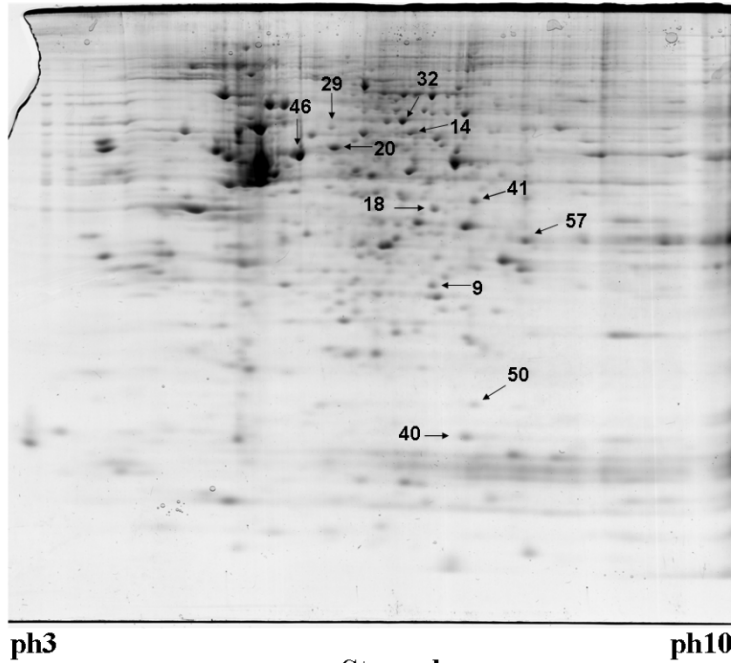

**B**

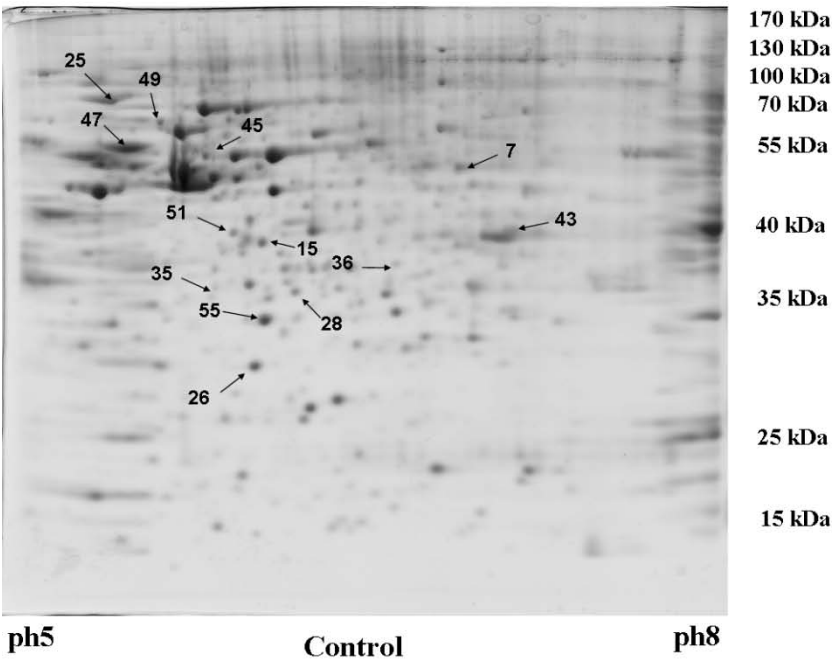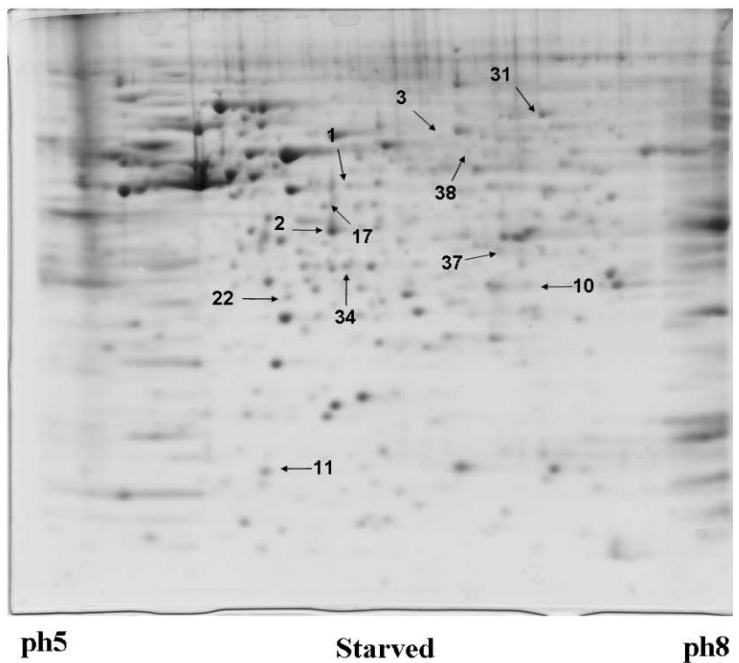

**A****Prohibitin**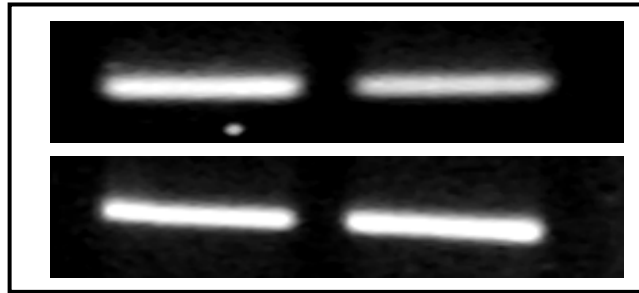 $\beta$ -actin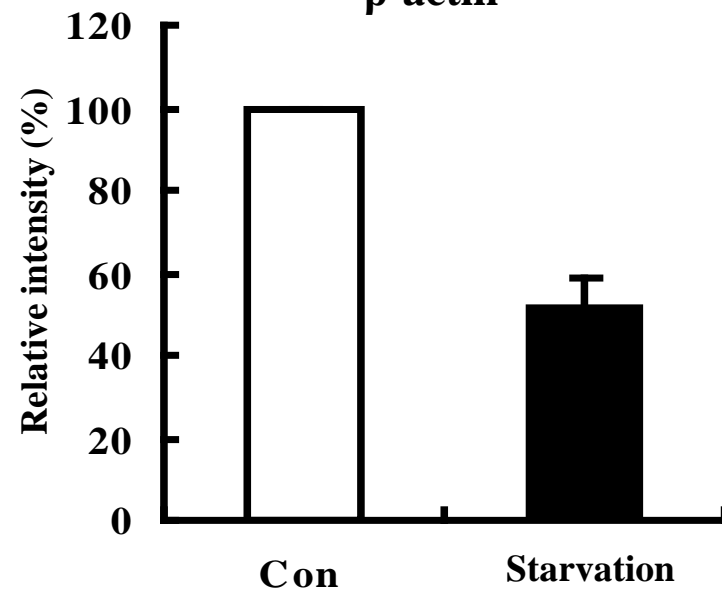**B****Phosphoglycerate mutase 1**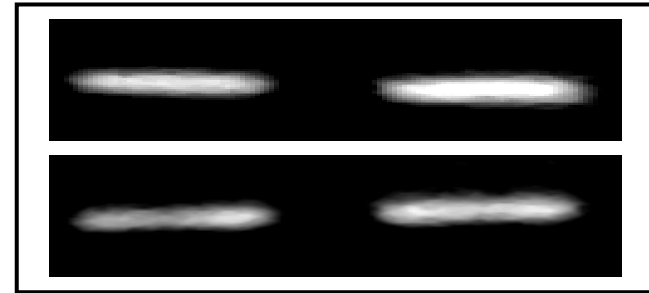 $\beta$ -actin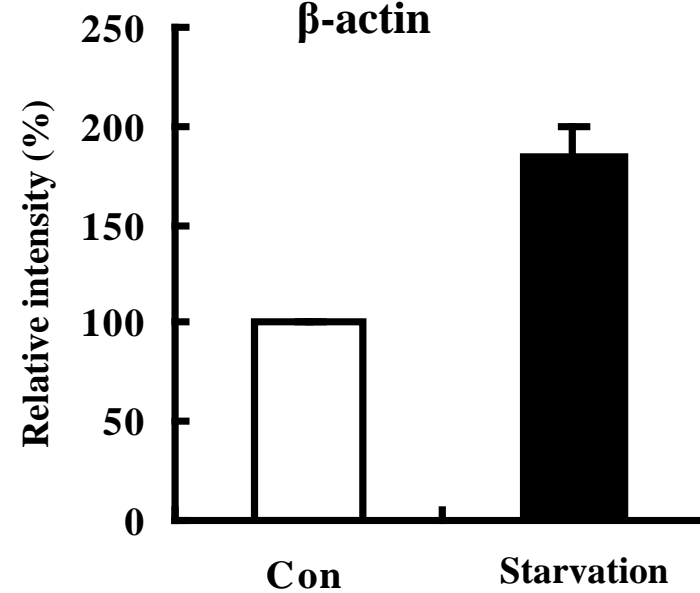

**C**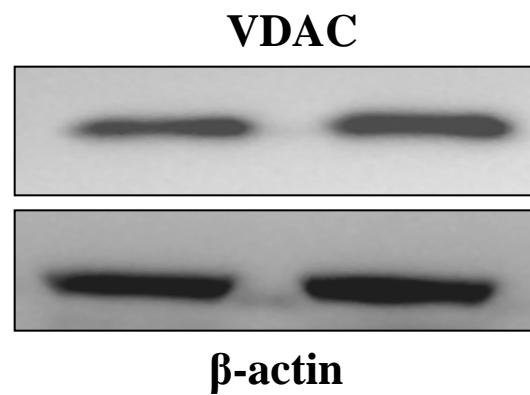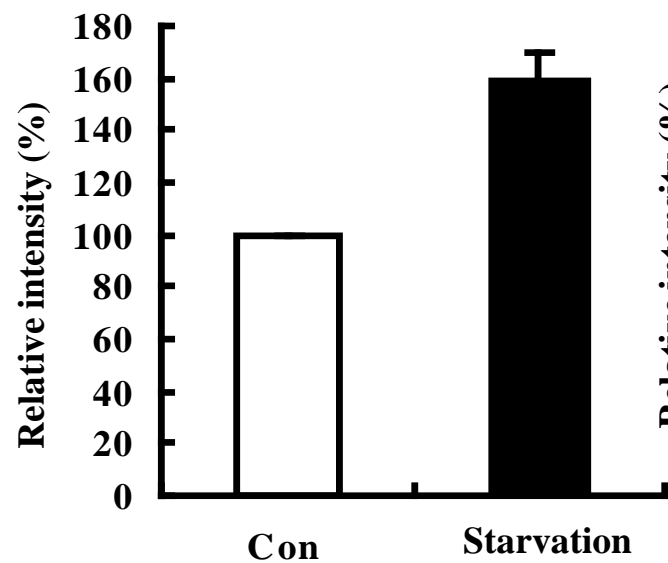**D**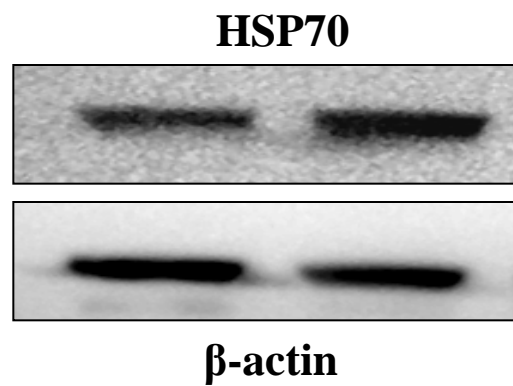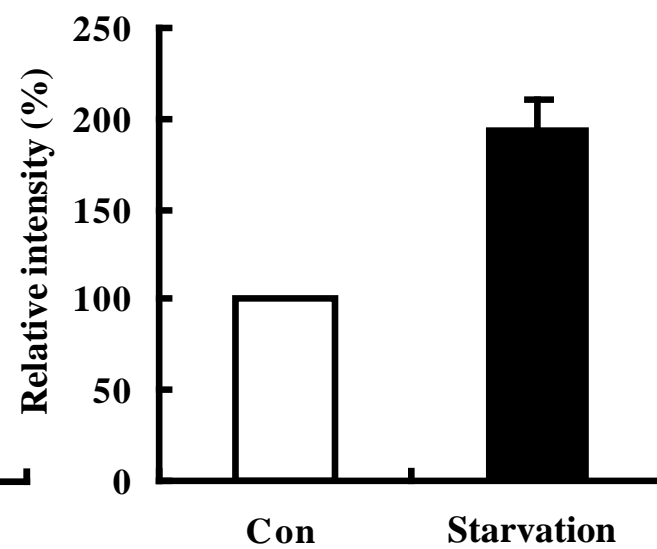**E**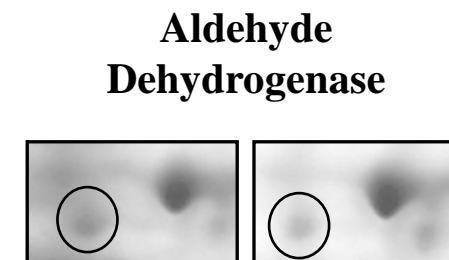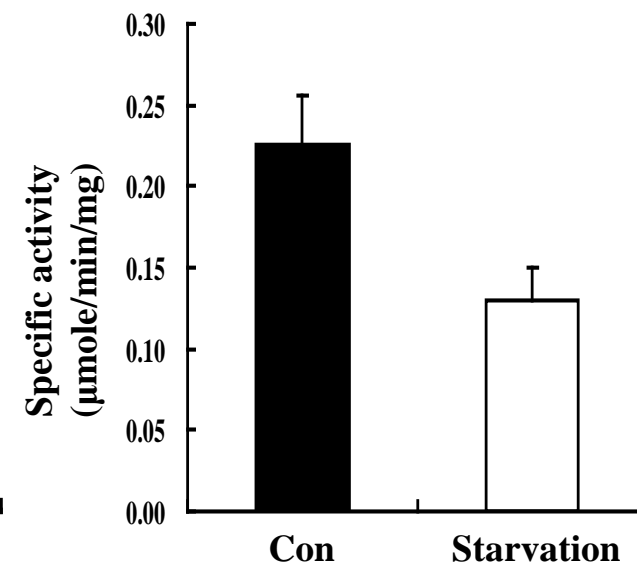

**Supplemental Table 1. Differentially expressed proteins in HCT 116 cells following starvation**

| Number of Spot                 | Name                                                    | Accession No. | Function                  | Localization  | Fold of Change | Obs. MW(kDa) | Obs. PI | Tho. MW(kDa) | Tho. PI | score    | Sequence coverrang (%) |
|--------------------------------|---------------------------------------------------------|---------------|---------------------------|---------------|----------------|--------------|---------|--------------|---------|----------|------------------------|
| <b>Carbohydrate Metabolism</b> |                                                         |               |                           |               |                |              |         |              |         |          |                        |
| 1                              | L-lactate dehydrogenase B chain                         | P07195        | Glycolysis                | Cytoplasm     | 0.6            | 42           | 6.3     | 36           | 5.7     | 6737     | 26.9                   |
| 2                              | L-lactate dehydrogenase B chain                         | P07195        | Glycolysis                | Cytoplasm     | 0.59           | 36           | 6.25    | 36           | 5.7     | 1.88E+06 | 22.2                   |
| 3                              | Aldehyde dehydrogenase                                  | P30837        | Carbohydrate metabolic    | Mitochondrion | 0.4            | 58           | 6.7     | 57           | 6.4     | 830211   | 31                     |
| 4                              | Dihydrolipoyl dehydrogenase                             | P09622        | Carbohydrate metabolic    | Mitochondrion | 0.6            | 54           | 7       | 54           | 7.6     | 721      | 14.1                   |
| 5                              | Fumarate hydratase                                      | P07954        | Carbohydrate metabolic    | Mitochondrion | 0.59           | 44           | 7.4     | 54           | 8.8     | 29764    | 21.2                   |
| 6                              | Glycerol-3-phosphate dehydrogenase                      | P43304        | Glycerol metabolism       | Mitochondrion | 0.6            | 80           | 6.6     | 80           | 7.2     | 221515   | 18.3                   |
| 7                              | Alpha-enolase                                           | P06733        | Glycolysis                | Cytoplasm     | 1.89           | 49           | 6.4     | 47           | 7       | 7818     | 20.3                   |
| 8                              | Alpha-enolase                                           | P06733        | Glycolysis                | Cytoplasm     | 1.71           | 46           | 7       | 47           | 7       | 4.31E+05 | 28.8                   |
| 9                              | Phosphoglycerate mutase 1                               | P18669        | Glycolysis                | Cytoplasm     | 2.63           | 29           | 6.8     | 28           | 6.7     | 9837     | 32.7                   |
| 10                             | Triosephosphate isomerase                               | P60174        | Carbohydrate metabolic    | Cytoplasm     | 1.67           | 26           | 7.1     | 26           | 6.4     | 2348     | 50.6                   |
| <b>Other Metabolism</b>        |                                                         |               |                           |               |                |              |         |              |         |          |                        |
| 11                             | ATP synthase D chain                                    | O75947        | ATP synthesis             | Mitochondrion | 0.59           | 20           | 5.6     | 18           | 5.2     | 46606    | 72                     |
| 12                             | ATP synthase subunit alpha                              | P25705        | ATP synthesis             | Mitochondrion | 0.6            | 55           | 8.6     | 59           | 9.2     | 4.18E+04 | 20.1                   |
| 13                             | Ubiquinol-cytochrome-c reductase complex core protein 1 | P31930        | Mitochondrial respiration | Mitochondrion | 2.16           | 52           | 5.5     | 52           | 5.9     | 1.94E+03 | 27.5                   |
| 14                             | Inosine-5'-monophosphate dehydrogenase 2                | P12268        | Purine metabolism         | Cytoplasm     | 1.6            | 56           | 6.5     | 55           | 6.4     | 22045    | 22.4                   |
| 15                             | Inorganic pyrophosphatase                               | Q15181        | Phosphate metabolic       | Cytoplasm     | 1.59           | 32           | 6       | 32           | 5.5     | 931      | 32.9                   |
| 16                             | Serine hydroxymethyltransferase                         | P34897        | Carbon metabolism         | Mitochondrion | 1.57           | 58           | 8.5     | 55           | 8.8     | 5356     | 15.9                   |
| <b>RNA processing</b>          |                                                         |               |                           |               |                |              |         |              |         |          |                        |
| 17                             | 60S acidic ribosomal protein                            | P05388        | Translation               | Cytoplasm     | 0.58           | 34           | 6.2     | 34           | 5.7     | 81449    | 35.6                   |

|    |                                           |        |               |         |      |    |     |    |     |          |      |
|----|-------------------------------------------|--------|---------------|---------|------|----|-----|----|-----|----------|------|
| 18 | Poly(rC)-binding protein 1                | Q15365 | Transcription | Nucleus | 1.83 | 38 | 6.9 | 37 | 6.7 | 5.92E+05 | 13.4 |
| 19 | Far upstream element-binding protein      | Q92945 | Transcription | Nucleus | 1.54 | 74 | 7.3 | 73 | 6.8 | 1.27E+04 | 14.1 |
| 20 | Heterogeneous nuclear ribonucleoprotein H | P31943 | Transcription | Nucleus | 1.57 | 49 | 6   | 49 | 5.9 | 2.91E+03 | 15.4 |
| 21 | mRNA turnover protein 4 homolog           | Q9UKD2 | Transcription | Nucleus | 1.6  | 48 | 6.7 | 27 | 8.3 | 97       | 13.8 |

### Protein Folding and Stress Response

|    |                                   |        |                           |                       |      |    |      |    |     |       |      |
|----|-----------------------------------|--------|---------------------------|-----------------------|------|----|------|----|-----|-------|------|
| 22 | Heat shock protein beta-1         | P04792 | Protein folding           | Cytoplasm             | 0.6  | 26 | 6.1  | 22 | 6   | 904   | 27.8 |
| 23 | Stress-70 protein                 | P38646 | Protein folding           | Mitochondrion         | 0.57 | 70 | 5.4  | 73 | 5.9 | 2120  | 19.3 |
| 24 | Heat shock protein 75 kDa         | Q12931 | Protein folding           | Mitochondrion         | 0.58 | 80 | 6.6  | 80 | 8.3 | 1302  | 21   |
| 25 | 78 kDa glucose-regulated protein  | P11021 | Unfolded protein response | Endoplasmic reticulum | 0.56 | 75 | 5.4  | 72 | 5.1 | 1137  | 15.7 |
| 26 | Glutathione S-transferase P       | P09211 | Redox regulation          | Cytoplasm             | 0.6  | 25 | 6.25 | 23 | 5.4 | 2912  | 26.2 |
| 27 | Protein disulfide-isomerase A3    | P30101 | Redox regulation          | Endoplasmic reticulum | 0.6  | 53 | 5.8  | 56 | 6   | 73614 | 18   |
| 28 | Peroxiredoxin-4                   | Q13162 | Redox regulation          | Cytoplasm             | 0.58 | 27 | 6.2  | 30 | 5.9 | 8474  | 28   |
| 29 | T-complex protein 1 subunit alpha | P17987 | Protein folding           | Cytoplasm             | 5.33 | 63 | 6.1  | 60 | 5.8 | 681   | 13.8 |
| 30 | T-complex protein 1 subunit beta  | P78371 | Protein folding           | Cytoplasm.            | 1.5  | 54 | 6.2  | 57 | 6   | 1430  | 20.4 |
| 31 | T-complex protein 1 subunit zeta  | P40227 | Protein folding           | Cytoplasm             | 2    | 62 | 7.1  | 58 | 6.2 | 552   | 14.7 |
| 32 | Stress-induced-phosphoprotein 1   | P31948 | Protein folding           | Golgi apparatus       | 1.62 | 63 | 6.5  | 62 | 6.4 | 525   | 21   |
| 33 | Heat shock cognate 71 kDa protein | P11142 | Protein folding           | Cytoplasm             | 1.82 | 70 | 5.3  | 70 | 7.4 | 20024 | 13.5 |

### Proteolysis

|    |                                                 |        |             |            |      |    |      |    |     |        |      |
|----|-------------------------------------------------|--------|-------------|------------|------|----|------|----|-----|--------|------|
| 34 | Proteasome activator complex subunit 1          | Q06323 | proteolysis | Proteasome | 0.6  | 28 | 6,2  | 28 | 5.8 | 82581  | 42.6 |
| 35 | Proteasome activator complex subunit 2          | Q9UL46 | proteolysis | Proteasome | 0.35 | 29 | 5.8  | 27 | 5.4 | 229436 | 42.3 |
| 36 | Proteasome subunit alpha type-1                 | P25786 | proteolysis | Proteasome | 0.6  | 32 | 6.75 | 29 | 6.1 | 1826   | 27   |
| 37 | Proteasome subunit alpha type-1                 | P25786 | proteolysis | Proteasome | 2.56 | 28 | 7    | 29 | 6.1 | 1731   | 28.9 |
| 38 | 26S proteasome non-ATPase regulatory subunit 11 | O00231 | proteolysis | Proteasome | 1.5  | 46 | 6.4  | 47 | 6.1 | 6199   | 24.6 |

---

**Transport and Trafficking**

|    |                                                      |        |             |                       |      |     |     |    |     |          |      |
|----|------------------------------------------------------|--------|-------------|-----------------------|------|-----|-----|----|-----|----------|------|
| 39 | Endoplasmic precursor                                | P14625 | Transport   | endoplasmic reticulum | 0.59 | 100 | 4.6 | 92 | 4.8 | 1.56E+03 | 9.8  |
| 40 | Golgi SNAP receptor complex member 1                 | O95249 | Transport   | Golgi apparatus       | 2.13 | 12  | 7.2 | 28 | 9.5 | 5.93     | 19.6 |
| 41 | Probable mitochondrial import receptor subunit TOM40 | O96008 | Transport   | Mitochondrion         | 1.59 | 36  | 7.3 | 37 | 6.8 | 1136     | 18.6 |
| 42 | Voltage-dependent anion-selective channel protein 2  | P45880 | Transport   | Mitochondrion         | 1.6  | 30  | 7.6 | 31 | 7.5 | 4.71E+06 | 45.6 |
| 43 | Annexin A1                                           | P04083 | Trafficking | Cytoplasm             | 3.67 | 33  | 7.2 | 38 | 6.6 | 68970    | 41.3 |
| 44 | Annexin A1                                           | P04083 | Trafficking | Cytoplasm             | 3.46 | 33  | 6.5 | 38 | 6.6 | 8172     | 25.4 |

---

**Cytoskeleton-related**

|    |                                         |        |                        |              |      |    |     |    |     |          |      |
|----|-----------------------------------------|--------|------------------------|--------------|------|----|-----|----|-----|----------|------|
| 45 | Cytokeratin-8                           | P05787 | Structural constituent | Cytoplasm    | 0.58 | 54 | 5.7 | 53 | 5.5 | 1305     | 31   |
| 46 | Cytokeratin-8                           | P05787 | Structural constituent | Cytoplasm    | 1.7  | 52 | 5.5 | 53 | 5.5 | 7.51E+03 | 10.8 |
| 47 | Tubulin alpha-1A chain                  | Q71U36 | Structural constituent | Cytoskeleton | 0.59 | 55 | 5.6 | 50 | 4.9 | 4516     | 15.7 |
| 48 | Tubulin alpha-1A chain                  | Q71U36 | Structural constituent | Cytoskeleton | 1.65 | 52 | 4.9 | 50 | 4.9 | 1.42E+05 | 20.2 |
| 49 | Lamin-B1                                | P20700 | Structural constituent | Nucleus      | 0.52 | 77 | 5.6 | 66 | 5.1 | 5942     | 25.4 |
| 50 | Cofilin-1                               | P23528 | Structural constituent | Cytoplasm    | 1.5  | 15 | 7   | 18 | 8.2 | 392      | 30.7 |
| 51 | F-actin-capping protein subunit alpha-1 | P52907 | Structural constituent | Cytoskeleton | 4.3  | 33 | 5.9 | 32 | 5.4 | 107884   | 39.5 |

---

**Cell signaling**

|    |                                        |        |                     |               |      |    |     |    |     |            |      |
|----|----------------------------------------|--------|---------------------|---------------|------|----|-----|----|-----|------------|------|
| 52 | Protein phosphatase 1A                 | P35813 | Cell cycle          | Cytoplasm     | 0.38 | 40 | 5.5 | 42 | 5.2 | 61         | 3.7  |
| 53 | Tripartite motif-containing protein 55 | Q9BYV6 | Signal transduction | Cytoplasm     | 0.54 | 55 | 4   | 60 | 4.7 | 1.10E+01   | 9.9  |
| 54 | Proliferation-associated protein       | Q9UQ80 | Cell cycle          | Nucleus       | 1.53 | 45 | 6.3 | 43 | 6.1 | 3580       | 24.4 |
| 55 | Prohibitin                             | P35232 | Cell growth         | Mitochondrion | 0.55 | 27 | 6   | 29 | 5.6 | 1.25e+8 16 | 58   |
| 56 | Prohibitin                             | P35232 | Cell growth         | Mitochondrion | 0.6  | 27 | 5.5 | 29 | 5.6 | 7609       | 37.5 |
| 57 | Annexin A2                             | P07355 | Cell cycle          | Membrane      | 0.57 | 32 | 7.7 | 38 | 7.6 | 2923       | 18.9 |

The numbers of spots are corresponding to those indicated in supplemental Figure 1.

Theo: theoretical. Obs.: experimental. Identification was performed using the softwares MS-Fit (<http://prospector.ucsf.edu/propector/4.272>) against respectively the NCBI (2007.10.10) and Swiss-Prot (Swissport. 2007.10.10) databases. Assignments were made according to UniProtKB/TrEMBL Release 39.0 of 22-Jul-2008: 6070084 entries and to UniProtKB/Swiss-Prot Release 56.0 of 22-Jul-2008: 392667 entries. Fold change is calculated by the ratio of mean of normalized volume of spot from amino acid starvation cells/mean of normalized volume of spot from control cells.
